# Supplementary material for: Incidence, Long-Term Visual Outcomes, and Mortality in Retinopathy of Prematurity in Korea: A Nationwide Population-Based Study
Source: PubMed Central journal article supplement — Invest Ophthalmol Vis Sci. 2020 Aug 6;61(10):14. doi: 10.1167/iovs.61.10.14 (PMC7443112; doi:10.1167/iovs.61.10.14), 2020-08-06
Supplement: iovs-61-10-14_s001.pdf [file iovs-61-10-14_s001.pdf]

**Table S1. Association of Ocular Comorbidities in Retinopathy of Prematurity Patients with Visual Impairment**

|                              | Total<br>(n = 138) | Birth weight categories |                           |                      |
|------------------------------|--------------------|-------------------------|---------------------------|----------------------|
|                              |                    | < 1500 g<br>(n = 68)    | 1500 – 2499 g<br>(n = 51) | ≥ 2500 g<br>(n = 19) |
| Congenital ocular anomalies* | 31                 | 11                      | 8                         | 12                   |
| Retinal dystrophies†         | 1                  | 0                       | 0                         | 1                    |
| Ocular neoplasms‡            | 4                  | 0                       | 0                         | 4                    |
| Severe ocular traumas§       | 0                  | 0                       | 0                         | 0                    |

\*anophthalmos, microphthalmos, macrophthalmos, congenital glaucoma, and congenital malformations of lens, anterior or posterior segment of eye.

†retinitis pigmentosa, Leber congenital amaurosis, and Stargardt disease.

‡retinoblastoma, and optic nerve glioma.

§injuries of optic nerve and pathways, rupture or penetrating wound of eyeball, and avulsion of eye.
