# Supplementary material for: Incidence, Long-Term Visual Outcomes, and Mortality in Retinopathy of Prematurity in Korea: A Nationwide Population-Based Study
Source: PubMed Central journal article supplement — Invest Ophthalmol Vis Sci. 2020 Aug 6;61(10):14. doi: 10.1167/iovs.61.10.14 (PMC7443112; doi:10.1167/iovs.61.10.14), 2020-08-06
Supplement: iovs-61-10-14_s002.pdf [file iovs-61-10-14_s002.pdf]

**Table S2. Comparison of the Incidence and the Proportion of Visual Impairment in Retinopathy of Prematurity According to the Birth weight and Gestational Age Categories**

|                                   | Total     | By Birth weights |             |           | By Gestational Age* |             |            | Missing |
|-----------------------------------|-----------|------------------|-------------|-----------|---------------------|-------------|------------|---------|
|                                   |           | < 1500 g         | 1500–2499 g | ≥ 2500 g  | < 28 weeks          | 28–37 weeks | ≥ 37 weeks |         |
| No. of population                 | 4,149,959 | 6,795            | 196,226     | 3,946,938 | 6,100               | 112,147     | 3,959,788  | 71,924  |
| No. of ROP                        | 8,273     | 2,155            | 4,993       | 1,125     | 1,982               | 5,187       | 61         | 1,043   |
| ROP incidence <sup>†</sup>        | 1.99      | 317.14           | 25.45       | 0.29      | 324.92              | 46.25       | 0.02       | 14.50   |
| No. of VI in ROP patients         | 138       | 68               | 51          | 19        | 54                  | 62          | 0          | 22      |
| VI proportion in ROP patients (%) | 1.67      | 3.16             | 1.02        | 1.69      | 2.72                | 1.20        | 0.00       | 2.11    |

ROP = retinopathy of prematurity; VI = visual impairment.

\*calculated by  $\{280 - [\text{estimated date of delivery} - \text{actual delivery date (days)}]\} / 7$ .

<sup>†</sup>Per 1000 newborns.
